# Supplementary material for: Outage analysis of a dual-hop OFDM amplify-and-forward relay system with subcarrier mapping in Rayleigh fading
Source: Springer Nature journal article supplement (doi:10.1186/1687-1499-2014-209), 2014-12-01

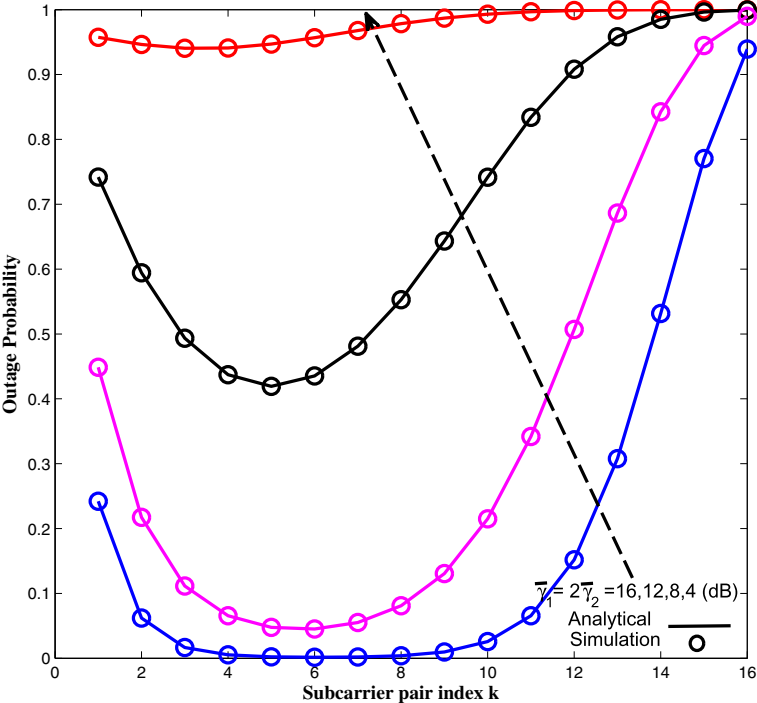

Supplement: 13638_2014_1078_MOESM5_ESM.pdf [file 13638_2014_1078_MOESM5_ESM.pdf]
